# Supplementary material for: Immune-driven recombination and loss of control after HIV superinfection
Source: PubMed Central journal article supplement — J Exp Med. 2008 Aug 4;205(8):1789–96. doi: 10.1084/jem.20080281 (PMC2525594; doi:10.1084/jem.20080281), 2008-08-04
Supplement: jem.20080281_5.pdf [file jem.20080281_5.pdf]

Streeck et al. | <http://www.jem.org/cgi/content/full/jem.20080281/DC1>

**Table S1.** Superinfection results in viral evolution in the majority of preexisting CD8<sup>+</sup> T cell responses

|     |      |    | B27_KK10   | B27_VL9  | B7_IL9    | A2_AL9    | B27_IK9   | Cw1_CL9   | Cw7_RY11    |
|-----|------|----|------------|----------|-----------|-----------|-----------|-----------|-------------|
|     |      |    | Gag        | Vpr      | Env       | Vpr       | Gag       | Env       | Nef         |
|     |      |    | 830 SFC    | 550 SFC  | 480 SFC   | 310 SFC   | 230 SFC   | 240 SFC   | 160 SFC     |
|     |      |    | KRWIILGLNK | VRHFPRWL | IPRRIRQGL | ALIRILQQL | IRLRPGGKK | CAPAGFAIL | KRQEILDLWVY |
| Day | 22   | T1 | .....      | .....    | .....     | .....     | .....     | .....     | .....       |
| Day | 83   | T2 | .....      | .....    | .....     | .....     | .....     | .....     | .....       |
| Day | 419  | T3 | ....M....  | .....    | .....     | ....S.... | .....     | .T.....   | .....       |
| Day | 503  | T4 | ....M....  | .K.....  | ..V.....  | ..V.T.... | .....     | .....     | Q.....      |
| Day | 545  | T5 | .....      | .....    | ..V.....  | ..V.T.... | .....     | .T.....   | Q.....      |
| Day | 664  | T6 | ....M....  | ....N..  | ..V.....  | ..V.T.... | .....     | .T.....   | Q.....      |
| Day | 762  | T7 | ..V.....   | ....N..  | ..V.....  | ..V.T.... | .....     | .T...T..  | Q.....      |
| Day | 860  | T8 | .K...M.... | ....N..  | ..V.....  | ..V.T.... | .....     | .T...T..  | Q.....      |
| Day | 1034 | T9 | .K...M.... | ....N..  | ..V.....  | ..V.T.... | .....     | .T...V.I  | Q.....      |

Superinfection and recombination events result in the development of mutations within six of the seven CD8 epitopes targeted early after primary infection.
